# Supplementary material for: Nanomechanical detection ofEscherichia coliinfection by bacteriophage T7 using cantilever sensors
Source: Royal Society of Chemistry journal article supplement (doi:10.1039/c9nr05240b), 2019-01-01
Supplement: c9nr05240b1.pdf [file c9nr05240b1.pdf]

## Supplementary Figure Legends

**Figure S1:** Scheme and photograph of the experimental setup. The experiments were performed in a flow-through glass cell (100  $\mu$ l) in which the cantilevers were immersed in LB solution. The temperature was controlled by means of a Peltier cell placed below the cantilever and a temperature sensor close to it. The liquid flow was controlled using a syringe pump (Cole Parmer) equipped with a low-pressure injector valve and injection loop. Cantilever deflection measurements were carried out with a homemade optical deflection system. The beam reflected off the chip was collected by a two-dimensional linear position detector (PD) (On-Trak Photonics, Inc.). The signal was converted and recorded with a home-made LabVIEW program to extract the value of deflection and power spectral density.

**Figure S2:** AFM topographic images of *E. coli* on the poly-L-lysine modified silicon nitride surface of the cantilever, with their corresponding scanning section on the right: **(a)** *E. coli* prior to interaction with bacteriophage T7 showed cylindrical particles 2  $\mu$ m in length, 500 nm in diameter with a roughness on the order of 1 nm. **(b)** *E. coli* after interaction with bacteriophage T7 at a concentration of  $10^9$  PFU/ml. *E. coli* morphology changed to flattened particles 1  $\mu$ m in length and 300 nm in diameter, surrounded by 50-nm protuberances suggesting the presence of phage T7 particles bound to the *E. coli* cell wall. **(c)** Histograms of slopes of the indentation curves showing rigidity values (spring constant,  $k$ ) for individual *E. coli* membranes. Gaussian fit of the data show a value of  $k = 0.073 \pm 0.016$  N/m.

**Figure S3:** (a) Snapshot of the deflection signal measured in **Figs. 3a and 4a** for  $75 \text{ min} < t < 80 \text{ min}$  show the fluctuation amplitude of the cantilever functionalized with *E. coli* (sky-blue curve) and after interaction with phage T7 at concentrations of  $10^9$  PFU/ml (red curve),  $10^7$  PFU/ml (purple curve),  $10^5$  PFU/ml (navy blue curve),  $10^3$  PFU/ml (green curve), and 10 PFU/ml (orange curve), respectively. Cantilever signal before (black curve) and after *E.coli* immobilization (blue curve) were added for comparison. (b) The histogram of the deflection distribution measured from these curves and (c) their corresponding Gaussian fittings show a normal distribution of the fluctuation signal. (d) Snapshot of the deflection signal measured for the cantilever after injection of phage T7 at 10 PFU/ml (**Fig. 4a, orange curve**) for  $40 \text{ min} < t < 120 \text{ min}$  showed successive upward and downward bending response due to conformational changes of the bacteria during exposure to the phage.

**Figure S4:** Analysis of the results for three different measurements of (a) deflection signal  $z$  and (b) mechanical energy ( $W$ ), for cantilevers functionalized with *E. coli* and exposed to phage T7 at  $10^3$  PFU/ml. (c) Calculated values of Variance ( $z$ ), Mean ( $z$ ), Slope ( $W$ ) and Var ( $W$ ) for the three experiments.

Fig. S1

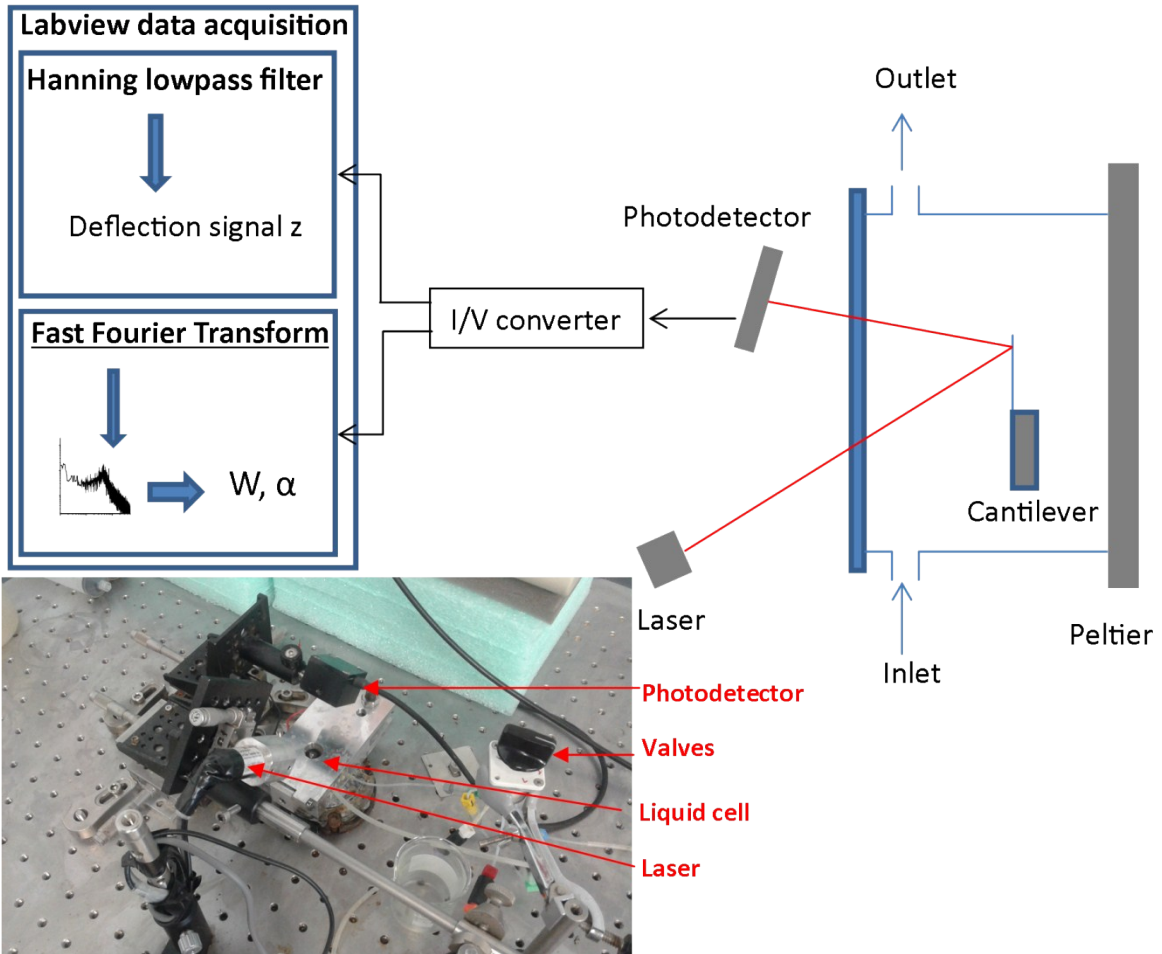

Fig. S2

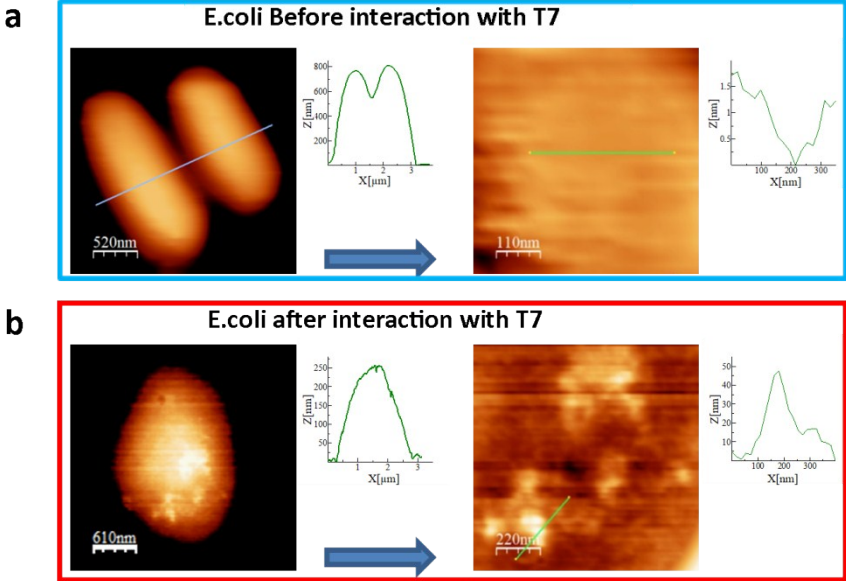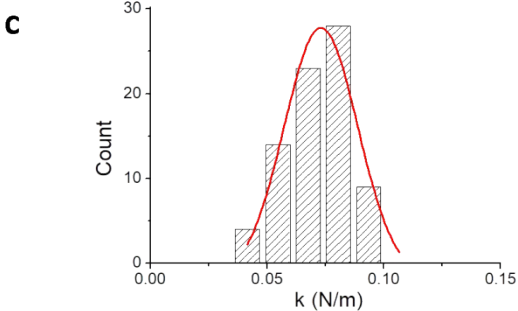

**Fig. S3**

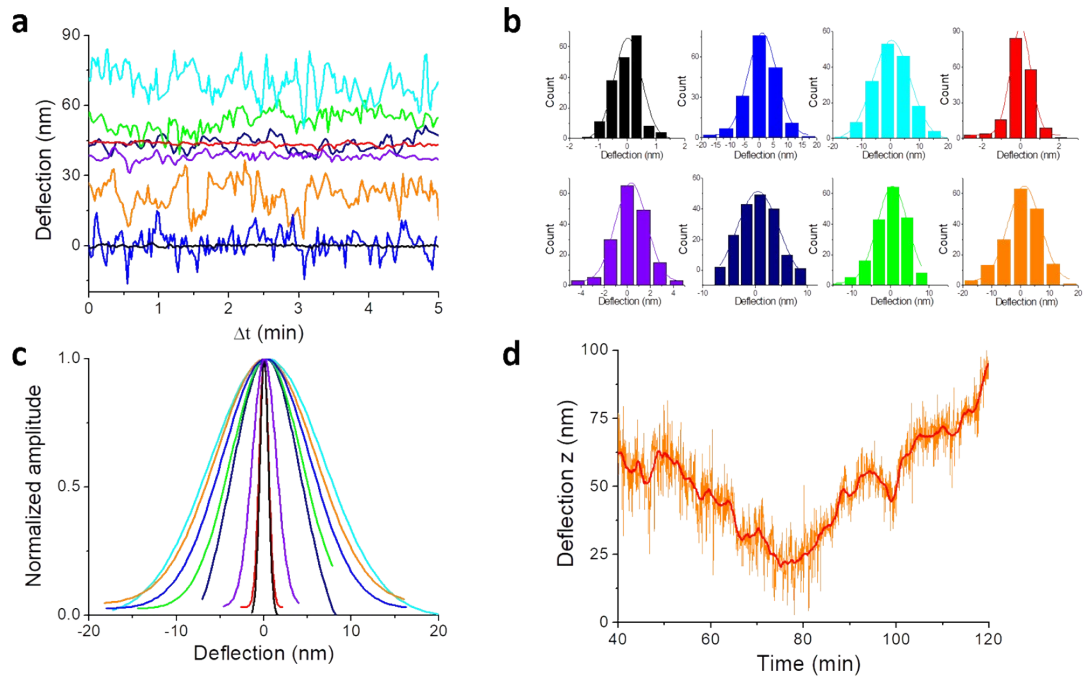

**Fig. S4**

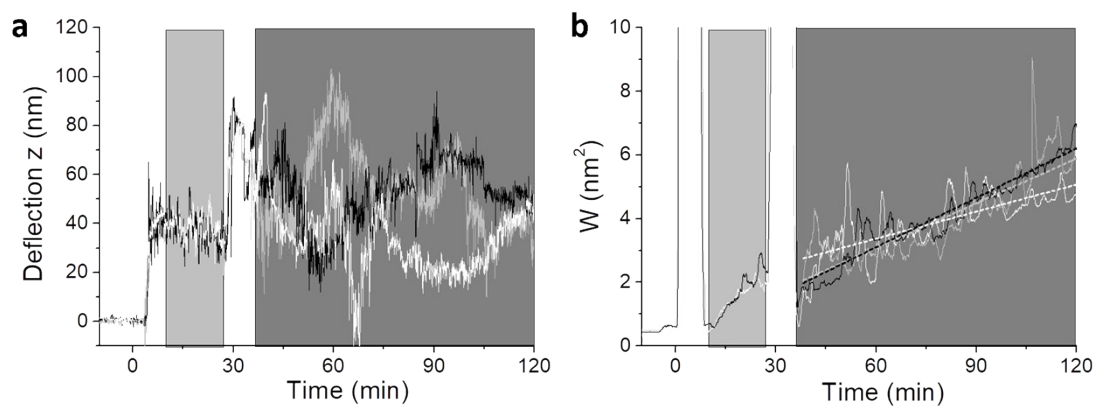

| <b>c</b>   | Variance z (nm <sup>2</sup> ) | Mean z (nm) | Slope W (nm <sup>2</sup> /h) | Variance W (nm <sup>4</sup> ) |
|------------|-------------------------------|-------------|------------------------------|-------------------------------|
| #1         | 19.88                         | 54.4        | 2.8                          | 0.527                         |
| #2         | 25.25                         | 48.6        | 3.09                         | 0.307                         |
| #3         | 15.32                         | 35.2        | 1.71                         | 0.152                         |
| Mean value | 20.15 ± 4.97                  | 46.1 ± 9.8  | 2.54 ± 0.74                  | 0.316 ± 0.205                 |
